# Supplementary material for: Isoprocurcumenol Supports Keratinocyte Growth and Survival through Epidermal Growth Factor Receptor Activation
Source: MDPI journal article supplement (doi:10.3390/ijms222212579), 2021-11-22
Supplement: s1 [file s1]

Supplementary Material

# Isoprocurcumenol Supports Keratinocyte Growth and Survival through Epidermal Growth Factor Receptor Activation

Paul Kwangho Kwon <sup>1,†</sup>, Sung Wook Kim <sup>2,†</sup>, Ranjit De <sup>2,3</sup>, Sung Woo Jeong <sup>1</sup> and Kyong-Tai Kim <sup>1,2,3,\*</sup>

<sup>1</sup> Research Institute of Industrial Science and Technology, Pohang 37673, Gyeongbuk, Korea; paul0925@rist.re.kr (P.K.K.); swjeong2014@rist.re.kr (S.W.J.)

<sup>2</sup> Department of Life Sciences, Pohang University of Science and Technology, Pohang 37673, Gyeongbuk, Korea; kimsw@postech.ac.kr (S.W.K.); deranjit@postech.ac.kr (R.D.)

<sup>3</sup> Division of Integrative Biosciences and Biotechnology, Pohang University of Science and Technology, Pohang 37673, Gyeongbuk, Korea

\* Correspondence: ktk@postech.ac.kr

† These authors contributed equally to this study

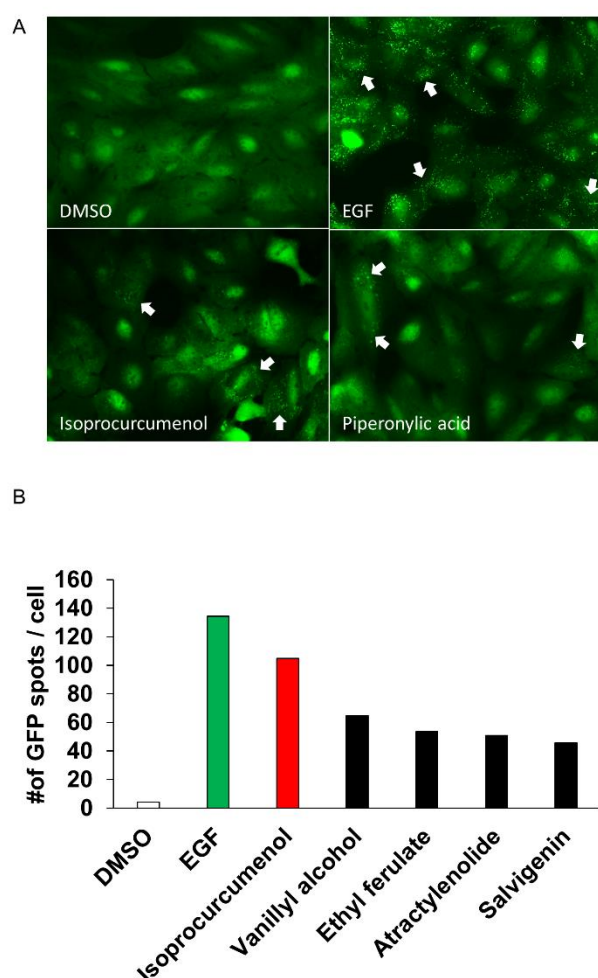

**Figure S1.** Comparison of IPC to other natural compounds. **(A)** Quantification of internalized GFP spots by indicated chemicals. Average number of GFP spots were counted per cell. **(B)** Comparison between IPC and piperonylic acid. Both IPC and piperonylic acid induced internalization of EGFR.

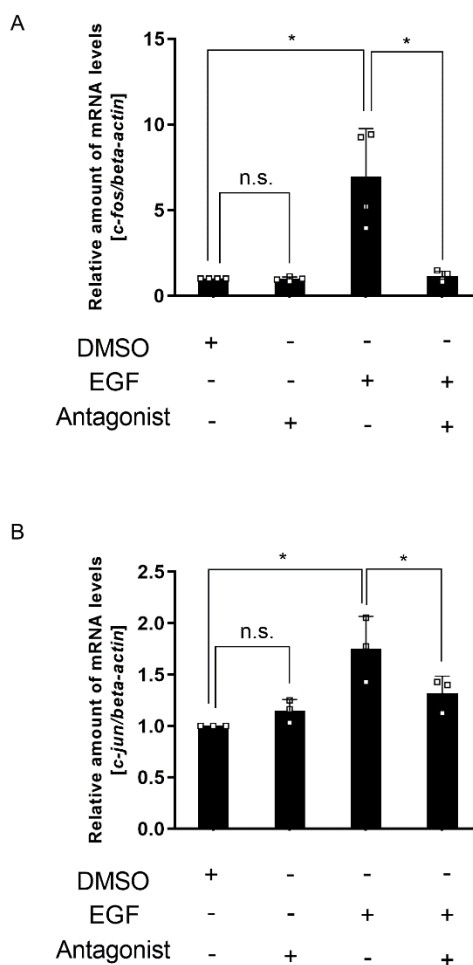

**Figure S2.** Measuring the effect of EGF on genes related to cell growth, after blocking EGFR signaling. (**A** and **B**) Measuring the effect of EGF on *c-fos* (**A**) and *c-jun* (**B**) mRNA level after blocking EGFR signaling. HaCaT cells were treated with AG-1478, an EGFR inhibitor, before being treated with EGF. mRNA levels of *c-fos*, and *c-jun* were measured through RT-qPCR. mRNA level of *beta-actin* was used for normalization. The experiment was repeated four times for (**A**) and three times for (**B**). n.s., not significant, \* $P < 0.05$ ; unpaired Student's t test; error bars indicate SDs.

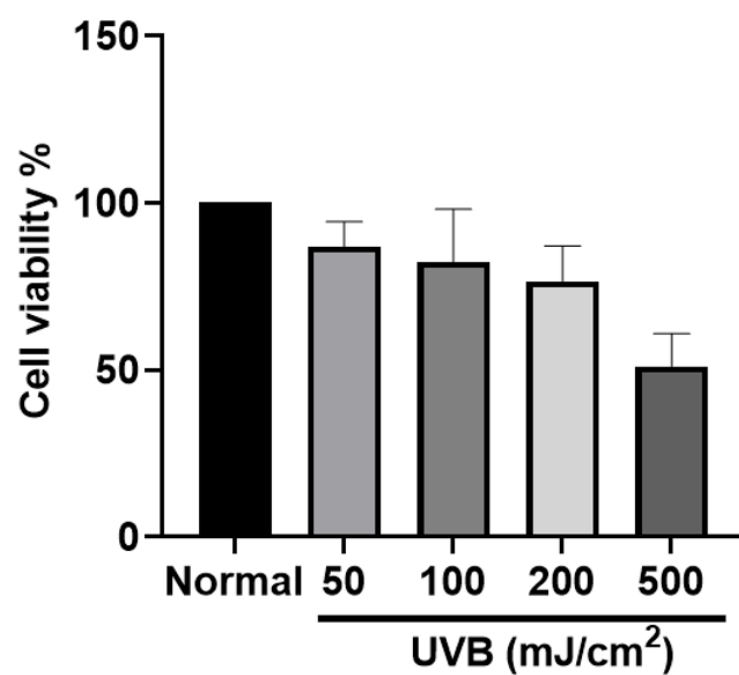

**Figure S3.** Finding the right condition of UV-B on cell viability. Cell viability was measured after UV-B irradiation. Different intensity of UV-B irradiation was treated to HaCaT cells. 500 mJ/cm<sup>2</sup> was strong enough to induce HaCaT cell death.
